# Supplementary material for: Offenders and non-offenders with schizophrenia spectrum disorders: the crime-preventive potential of sufficient embedment in the mental healthcare and support system
Source: PubMed Central journal article supplement (PMC10498463; doi:10.3389/fpsyt.2023.1231851), 2023-08-30
Supplement: Table_1.pdf [file Table_1.pdf]

# 1 Appendix

| Variable Code | Label                                                                | Definition                                                                                                                                                                                                                                                                                                                                                                                                                                                                                                             |
|---------------|----------------------------------------------------------------------|------------------------------------------------------------------------------------------------------------------------------------------------------------------------------------------------------------------------------------------------------------------------------------------------------------------------------------------------------------------------------------------------------------------------------------------------------------------------------------------------------------------------|
| PH1           | Age at which the F2x diagnosis was given?                            | Age (in years) at which the patient was diagnosed with any schizophrenia spectrum disorder for the first time (ICD-10: F2x.x)                                                                                                                                                                                                                                                                                                                                                                                          |
| PH2           | Age at which the patient showed first symptoms of the F2x diagnosis? | Age (in years) at which he/she showed any of the symptoms that are described in the ICD-10 under the corresponding F2x.x diagnosis (see item PH1) for the first time; <b>unless</b> the symptoms can be better explained by other causes (e. g. substance consumption)                                                                                                                                                                                                                                                 |
| PH3           | History of delusions                                                 | Yes, if he/she (had) experienced any type of delusion (persecutory delusions, delusions of grandeur). ‘Delusion’ was defined as ‘a false belief based on incorrect inference about external reality that is firmly sustained despite what almost everybody else believes and despite what constitutes incontrovertible and obvious proof or evidence to the contrary. The belief is not one ordinarily accepted by other members of the person’s culture or subculture (e.g. it is not an article of religious faith)’ |
| PH4           | History of hallucinations                                            | Yes, if he/she (had) experienced any visual, auditory, olfactory, tactile and/or gustatory hallucinations.                                                                                                                                                                                                                                                                                                                                                                                                             |
| PH5           | History of penetrability of the own ego                              | Yes, if he/she (had) experienced any of the following: thought insertion, thought withdrawal, thought broadcasting, thought echo, depersonalisation, derealisation and/or delusions of control                                                                                                                                                                                                                                                                                                                         |
| PH6           | History of disorders of affect or drive                              | Yes, if he/she (had) experienced any mania- and/or depression-like symptoms with the consequence of any type of functional impairment (distress and/or disability)                                                                                                                                                                                                                                                                                                                                                     |
| PH7           | History of negative symptoms                                         | Yes, if he/she (had) experienced any types of negative symptoms which are listed in the positive and negative syndrome scale (PANSS), which cannot be better explained by other causes (such as, for example, another mental illness)                                                                                                                                                                                                                                                                                  |
| PH10a         | History of suicide attempts                                          | Yes, if he/she had harmed himself/herself intentionally with suicidal intent at any one time before the investigated offence respectively the time of the referenced hospitalization                                                                                                                                                                                                                                                                                                                                   |
| PH11a         | History of endangerment of others                                    | Yes, if, at any one time before the investigated offence respectively the referenced hospitalization, he/she had deliberately or negligently put one or more other person(s) at any type of risk (e.g., by the exertion of violence), which entailed the potential or actual consequence of a substantial mental and/or physical impairment of the corresponding person(s)                                                                                                                                             |
| PH12a         | Was there ever any compulsory measure during a hospitalization used? | Yes, if one or more of the following measures had been forced upon the patient in a psychiatric hospital at any one time before the investigated offence respectively the referenced hospitalization: <ul style="list-style-type: none"> <li>- involuntary isolation</li> <li>- mechanical fixation (any type)</li> <li>- compulsory medication (oral AND/OR parenteral)</li> <li>- involuntary retention in the clinic (after voluntary admission)</li> </ul>                                                         |

|       |                                                   |                                                                                                                                                                                                                                                                                                                                                                                                              |
|-------|---------------------------------------------------|--------------------------------------------------------------------------------------------------------------------------------------------------------------------------------------------------------------------------------------------------------------------------------------------------------------------------------------------------------------------------------------------------------------|
| PH13  | Alcohol abuse                                     | Yes, if he/she (had) had an alcohol consumption pattern corresponding to the ICD-10 diagnosis “Harmful use (F10.1)” or “Dependence syndrome (F10.2x)” at the time of or at any one time before the investigated offence respectively the referenced hospitalization                                                                                                                                          |
| PH14a | No drug abuse                                     | Yes, if he/she did not have and had not had a substance consumption pattern corresponding to the ICD-10 diagnosis “Harmful use (F1x.1)” or “Dependence syndrome (F1x.2x)” at the time of and at any one time before the investigated offence respectively the referenced hospitalization. In this item, the term ‘substance’ refers to illicit drugs and prescription medications but <b>not</b> to alcohol. |
| PH14b | Cannabis abuse/-dependence?                       | Yes, if he/she (had) had a cannabinoid consumption pattern corresponding to the ICD-10 diagnosis “Harmful use (F12.1)” or “Dependence syndrome (F12.2x)” at the time of or at any one time before the investigated offence respectively the referenced hospitalization                                                                                                                                       |
| PH14c | Opioid abuse/-dependence?                         | Yes, if he/she (had) had an opioid consumption pattern corresponding to the ICD-10 diagnosis “Harmful use (F11.1)” or “Dependence syndrome (F11.2x)” at the time of or at any one time before the investigated offence respectively the referenced hospitalization                                                                                                                                           |
| PH14d | Cocaine abuse/-dependence?                        | Yes, if he/she (had) had a cocaine consumption pattern corresponding to the ICD-10 diagnosis “Harmful use (F14.1)” or “Dependence syndrome (F14.2x)” at the time of or at any time before the investigated offence respectively the referenced hospitalization                                                                                                                                               |
| PH14e | consumption of stimulants, amphetamines, ecstasy? | Yes, if he/she (had) had a stimulant consumption pattern corresponding to the ICD-10 diagnosis “Harmful use (F15.1)” or “Dependence syndrome (F15.2x)” at the time of or at any time before the investigated offence respectively the referenced hospitalization; except for cocaine (see item PH14d) and caffeine                                                                                           |
| PH15a | Presence of a personality disorder (PD)?          | Yes, if he/she had ever been diagnosed with any personality disorder listed in the ICD-10 (F60.x, F61) and/or the DSM-V                                                                                                                                                                                                                                                                                      |
| PH16a | Personality disorder: paranoid                    | Yes, if he/she was diagnosed with paranoid personality disorder and/or exhibited a stable pattern of symptoms that can be considered compatible with a paranoid personality disorder (ICD-10: F60.0) or a paranoid accentuation of personality traits (ICD-10: Z73.1) at the time of or at any time before the investigated offence respectively the referenced hospitalization                              |
| PH16b | Personality disorder: schizoid                    | Yes, if he/she was diagnosed with schizoid personality disorder and/or exhibited a stable pattern of symptoms that can be considered compatible with a schizoid personality disorder (ICD-10: F60.1) or a schizoid accentuation of personality traits (ICD-10: Z73.1) at the time of or at any time before the investigated offence respectively the referenced hospitalization                              |
| PH16c | Personality disorder: dissocial                   | Yes, if he/she was diagnosed with dissocial or antisocial personality disorder and/or exhibited a stable pattern of symptoms that can be considered compatible with a dissocial personality disorder (ICD-10: F60.2) or a dissocial accentuation of personality traits (ICD-10: Z73.1) at the time of or at any time before the investigated offence respectively the referenced hospitalization             |

|       |                                             |                                                                                                                                                                                                                                                                                                                                                                                                                                                   |
|-------|---------------------------------------------|---------------------------------------------------------------------------------------------------------------------------------------------------------------------------------------------------------------------------------------------------------------------------------------------------------------------------------------------------------------------------------------------------------------------------------------------------|
| PH16d | Personality disorder: emotionally unstable  | Yes, if he/she was diagnosed with emotionally unstable or borderline personality disorder and/or exhibited a stable pattern of symptoms that can be considered compatible with an emotionally unstable personality disorder (ICD-10: F60.3x) or an emotionally unstable accentuation of personality traits (ICD-10: Z73.1) at the time of or at any time before the investigated offence respectively the referenced hospitalization              |
| PH16e | Personality disorder: anancastic            | Yes, if he/she was diagnosed with anancastic or obsessive-compulsive personality disorder and/or exhibited a stable pattern of symptoms that can be considered compatible with an anancastic personality disorder (ICD-10: F60.5) or an anancastic accentuation of personality traits (ICD-10: Z73.1) at the time of or at any time before the investigated offence respectively the referenced hospitalization                                   |
| PH16f | Personality disorder: dependent             | Yes, if he/she was diagnosed with dependent personality disorder and/or exhibited a stable pattern of symptoms that can be considered compatible with a dependent personality disorder (ICD-10: F60.7) or a dependent accentuation of personality traits (ICD-10: Z73.1) at the time of or at any time before the investigated offence respectively the referenced hospitalization                                                                |
| PH16g | Personality disorder: histrionic            | Yes, if he/she was diagnosed with histrionic personality disorder and/or exhibited a stable pattern of symptoms that can be considered compatible with a histrionic personality disorder (ICD-10: F60.4) or a histrionic accentuation of personality traits (ICD-10: Z73.1) at the time of or at any time before the investigated offence respectively the referenced hospitalization                                                             |
| PH16h | Personality disorder: narcissistic          | Yes, if he/she was diagnosed with narcissistic personality disorder and/or exhibited a stable pattern of symptoms that can be considered compatible with a narcissistic personality disorder (ICD-10: F60.8) or a narcissistic accentuation of personality traits (ICD-10: Z73.1) at the time of or at any time before the investigated offence respectively the referenced hospitalization                                                       |
| PH17a | Any other psychiatric comorbidity           | Yes, if he/she was diagnosed with any mental illness listed in the ICD-10 or DSM-5 at the time of the investigated offence except for the ones covered in the aforementioned items                                                                                                                                                                                                                                                                |
| PH18a | Any outpatient psychiatric treatment(s)?    | Yes, if he/she had visited a mental health care provider (psychologist and/or psychiatrist) as an outpatient at any time before the investigated offence respectively the referenced hospitalization, regardless of the duration of said treatment                                                                                                                                                                                                |
| PH19a | Any inpatient psychiatric treatment(s)?     | Yes, if he/she had been an inpatient and/or a semi-inpatient in a mental health care institution at any time before the investigated offence respectively the referenced hospitalization, regardless of the duration of said treatment                                                                                                                                                                                                            |
| PH22a | Was the patient ever compulsorily admitted? | Yes, if he/she had been involuntarily admitted to any mental health care institution by order of an authorised person (such as a physician) at any one time before the investigated offence respectively the referenced hospitalization. Compulsory admission is defined as application of the Swiss "Fürsorgerische Unterbringung (FU)" OR "Fürsorgerischer Freiheitsentzug (FFE)" according to the Swiss child and adult protection law (KESR). |

|       |                                                                                                 |                                                                                                                                                                                                                                                                                                                                                                                                                                                                                                                                                                                                 |
|-------|-------------------------------------------------------------------------------------------------|-------------------------------------------------------------------------------------------------------------------------------------------------------------------------------------------------------------------------------------------------------------------------------------------------------------------------------------------------------------------------------------------------------------------------------------------------------------------------------------------------------------------------------------------------------------------------------------------------|
| PH23a | Antipsychotic medication                                                                        | Yes, if he/she had been prescribed any antipsychotic medication at any time before the investigated offence respectively the referenced hospitalization<br><br>(PH23b-o are covering all substances separately)                                                                                                                                                                                                                                                                                                                                                                                 |
| PH23p | Regular intake of antipsychotic medication                                                      | Yes, if he/she, mental health professionals and trusted private persons (e.g., close family members) had <b>not</b> reported/documentated a lack of compliance/adherence to any antipsychotic medications at any time before the investigated offence <b>AND</b> if mental health professionals and trusted private persons (e.g., close family members) had <b>not</b> had reasonable grounds for suspecting that the patient lacked medication compliance/adherence to any antipsychotic medications at any time before the investigated offence respectively the referenced hospitalization. |
| PH24a | Any other type of pharmacotherapy in psychiatric history                                        | Yes, if he/she had been prescribed any type of psychiatric medication at any time before the investigated offence respectively the referenced hospitalization; except for antipsychotic medications<br><br>(PH24b-e are covering the substance groups separately)                                                                                                                                                                                                                                                                                                                               |
| PH25a | Any problems in the treatment of the patient before the investigated offence / hospitalization? | Yes, if any of the following items PH25b – PH25i applies: Noncompliance, did not go to his outpatient treatment, consumed alcohol/drugs, homelessness, no health insurance, treatment for other diagnosis, non adherence to therapy/refused therapy                                                                                                                                                                                                                                                                                                                                             |
| PH25j | If there were any difficulties (PH25a YES), was there any reaction?                             | Yes, if measures to counteract the problems in treatment were taken (e. g. establishment of some form of assisted living, compulsory admissions, establishment of legal supervision)                                                                                                                                                                                                                                                                                                                                                                                                            |
| PH26a | Alerts by third parties about danger originating from the patient                               | Yes, if any report from a private person, an official, a public authority and/or a person involved in the individual's care had indicated a substantially increased risk for any type of delinquency originating from the individual at any time before the investigated offence resp. the referenced hospitalization (PH26b: was there any reaction)                                                                                                                                                                                                                                           |
| PH27a | Legal complaints by third parties                                                               | Yes, if any private person, official, public authority and/or person involved in the individual's care had filed a police/legal complaint at any time before the investigated offence resp. the referenced hospitalization                                                                                                                                                                                                                                                                                                                                                                      |
| PH27b | Efforts by third parties to seek psychiatric help                                               | Yes, if he/she, mental health professionals or trusted private persons (e.g., close family members) had reported/documentated that any relative(s) and/or legal guardian repeatedly had advised and/or urged him/her to seek psychiatric treatment at any time before the investigated offence AND/OR if he/she had been involuntarily admitted to a mental health care institution on request of any relative(s) and/or legal guardian at any time before the investigated offence resp. the ref. hospitalization                                                                              |
| R1a-d | Current psychiatric F2x-diagnosis                                                               | Diagnosis acc. to ICD-10 given at the time of admission to the referenced forensic hospitalization                                                                                                                                                                                                                                                                                                                                                                                                                                                                                              |
| R8a-q | Pharmacotherapy during referenced hospitalization                                               | Substances prescribed during the referenced hospitalization unless the targeted administration dose was not reached                                                                                                                                                                                                                                                                                                                                                                                                                                                                             |
| R3    | Was the patient first diagnosed at admission?                                                   | Yes, if his/her diagnosis of schizophrenia spectrum disorder (ICD-10: F2x.x) at the time of discharge from the referenced forensic hospital had been given within the first month after admission to the referenced forensic hospital                                                                                                                                                                                                                                                                                                                                                           |

|        |                                                                                             |                                                                                                                                                                                                                                                                                                                                                                                |
|--------|---------------------------------------------------------------------------------------------|--------------------------------------------------------------------------------------------------------------------------------------------------------------------------------------------------------------------------------------------------------------------------------------------------------------------------------------------------------------------------------|
| R9e    | Olanzapine equivalents at the time of discharge?                                            | Cumulative dose of antipsychotic medication included in his/her prescription schedule at the time of discharge from the referenced forensic hospital converted to olanzapine equivalents in milligrams                                                                                                                                                                         |
| R9f    | Polypharmacy at discharge                                                                   | Yes, if his/her prescription schedule included two or more different antipsychotics at the time of discharge from the referenced hospital                                                                                                                                                                                                                                      |
| R10    | Was the patient ever suicidal during the referenced hospitalization?                        | Yes, if he/she reported that he/she has experienced active suicidal ideation at any one time during the referenced hospitalisation <b>AND/OR</b> if he/she attempted suicide during the current hospitalisation (see item R12)                                                                                                                                                 |
| R11    | Did the patient ever show any self-harming behavior during the referenced hospitalization?  | Yes, if he/she intentionally harmed himself/herself (by cutting, burning or other means) at any one time during the referenced hospitalization (including self-harming behavior with suicidal intent (see item R12))                                                                                                                                                           |
| R12    | Did the patient ever attempt suicide during the referenced hospitalization?                 | Yes, if he/she intentionally harmed himself/herself with suicidal intent at any one time during the referenced hospitalization                                                                                                                                                                                                                                                 |
| R13a   | Compulsory measure                                                                          | Yes, if one or more of the following measures was forced upon him/her during the referenced forensic hospitalization:<br><ul style="list-style-type: none"> <li>- involuntary isolation</li> <li>- mechanical fixation (any type)</li> <li>- compulsory medication (any type)</li> </ul>                                                                                       |
| R14    | Compulsory measure as consequence of endangerment of others                                 | Yes, if, at any one time during the referenced forensic hospitalisation, he/she deliberately or negligently put one or more other person(s) at any type of risk (e.g., by the exertion of violence) which entailed the potential or actual consequence of a substantial mental and/or physical impairment of the corresponding person(s), thus leading to a compulsory measure |
| R15a-g | Main content of psychotherapy during ref. hospitalization                                   | Yes, if one of the following subjects was taken up in > 50 % of therapeutic conversations during the referenced hospitalization: regulations, daily hospital routine, biography, offending, medication, disorder/symptoms, future perspectives                                                                                                                                 |
| R16a   | No Problems during psychotherapy                                                            | Yes, if none of the items 16b – 16h is answered with 'yes' (refers to referenced hospitalization)                                                                                                                                                                                                                                                                              |
| R16b-h | Type of problems during psychotherapy                                                       | Lack of compliance, break off by therapist/patient, deterioration, extensive cognitive impairment, language barrier, severe occupation with delusions                                                                                                                                                                                                                          |
| R17a   | No occupational/ergo therapy                                                                | Yes, if he/she participated type in 10 or less ergo therapy sessions during the referenced forensic hospitalization                                                                                                                                                                                                                                                            |
| R17b-g | Type of occupational/ergo therapy                                                           | Basic work, small household task, basic industrial work, advanced industrial work, gardening, woodwork                                                                                                                                                                                                                                                                         |
| R18    | Problems during occupational/ ergo therapy                                                  | Yes, if, during the referenced hospitalization, three or more ergo therapists independently reported or indicated that the patient had shown a lack of compliance, (neuro)cognitive impairments, psychological disabilities, antisocial behavior and/or linguistic problems which had had a substantial negative impact on the course of an ergo therapy session               |
| R20b/c | Did the patient ever show any endangerment of others during the referenced hospitalization? | Yes, if he/she showed any physical or verbal aggressions towards one or more staff member(s) or one or more other patient(s) at any one time during the referenced hospitalization.                                                                                                                                                                                            |

|      |                                                                        |                                                                                                                                                                                                                                                                                                                                                                                                                                                                                     |
|------|------------------------------------------------------------------------|-------------------------------------------------------------------------------------------------------------------------------------------------------------------------------------------------------------------------------------------------------------------------------------------------------------------------------------------------------------------------------------------------------------------------------------------------------------------------------------|
|      |                                                                        | Note: Aggression is defined as “a behavior that is intended to harm another person who is motivated to avoid that harm”                                                                                                                                                                                                                                                                                                                                                             |
| R20d | Damage of property during ref. hospitalization                         | Yes, if, at any one time during the referenced hospitalization, he/she intentionally damaged any property that was not under his/her ownership                                                                                                                                                                                                                                                                                                                                      |
| R20e | Came back late from administrative leave during ref. hospitalization   | Yes, if, at any one time during the referenced hospitalization, he/she stayed away from the station for longer than allowed but eventually returned without police                                                                                                                                                                                                                                                                                                                  |
| R20f | Threat/attempt to escape during ref. hospitalization                   | Yes, if, at any one time during the referenced hospitalization, he/she threatened and/or was reported to have attempted to leave the station without permission (regardless of whether he/she had stated that she would eventually return or not; and regardless of whether he/she actually left the station or not)                                                                                                                                                                |
| R20g | escape during ref. hospitalization                                     | Yes, if, at any one time during the referenced hospitalization, he/she left the station without permission OR stayed away from the station for longer than allowed and was eventually returned by the police                                                                                                                                                                                                                                                                        |
| R20h | Intake/dealing of alcohol/drugs/medication during ref. hospitalization | Yes, if, at any one time during the referenced hospitalization, mental health professional confirmed that he/she had engaged in the prohibited consumption and/or trade of substances (including alcohol and prescription medications) OR if, at any one time during the referenced hospitalization, there were reasonable grounds for suspecting that he/she had engaged in the prohibited consumption and/or trade of substances (including alcohol and prescription medications) |
| R20i | Theft during ref. hospitalization                                      | Yes, if, at any one time during the referenced hospitalization, he/she was reported to have illicitly taken possession of any type of object that was not under his/her ownership                                                                                                                                                                                                                                                                                                   |
| R20j | Sexual assault during ref. hospitalization                             | Yes, if, at any one time during the referenced hospitalization, he/she was reported to have shown any verbal aggressions, physical aggressions and/or otherwise intimidating behavior that aimed at forcing a victim to any type of unwanted sexual behavior                                                                                                                                                                                                                        |
| R27a | Evaluation of results of treatment regarding F2x-diagnosis             | Estimated change in symptom severity and functional impairment (distress and/or functional impairment) during the course of the stay in the referenced hospital                                                                                                                                                                                                                                                                                                                     |
| R27c | Evaluation of results of treatment regarding F1x-diagnosis             | Estimated change in the risk of relapsing into a substance consumption pattern corresponding to the ICD-10 diagnosis “Harmful use (F10.1)” or “Dependence syndrome (F10.2x)” during the course of the stay in the referenced hospital                                                                                                                                                                                                                                               |
| PA1  | PANSS at admission: Scale Delusion                                     | Score in the PANSS item ‘delusion’ at the time of admission to the referenced hospital                                                                                                                                                                                                                                                                                                                                                                                              |
| PA2  | PANSS at admission: Scale Conceptual disorganization                   | Score in the PANSS item ‘conceptual disorganization’ at the time of admission to the referenced hospital                                                                                                                                                                                                                                                                                                                                                                            |

|      |                                                                        |                                                                                                                            |
|------|------------------------------------------------------------------------|----------------------------------------------------------------------------------------------------------------------------|
| PA3  | PANSS at admission: Scale Hallucinations                               | Score in the PANSS item 'hallucinations' at the time of admission to the referenced hospital                               |
| PA4  | PANSS at admission: Scale Hyperactivity                                | Score in the PANSS item 'hyperactivity' at the time of admission to the referenced hospital                                |
| PA5  | PANSS at admission: Scale Grandiosity                                  | Score in the PANSS item 'grandiosity' at the time of admission to the referenced hospital                                  |
| PA6  | PANSS at admission: Scale suspiciousness/persecution                   | Score in the PANSS item 'suspiciousness/persecution' at the time of admission to the referenced hospital                   |
| PA7  | PANSS at admission: Scale Hostility                                    | Score in the PANSS item 'hostility' at the time of admission to the referenced hospital                                    |
| PA8  | PANSS at admission: Scale Blunted affect                               | Score in the PANSS item 'blunted affect' at the time of admission to the referenced hospital                               |
| PA9  | PANSS at admission: Scale Emotional withdrawal                         | Score in the PANSS item 'emotional withdrawal' at the time of admission to the referenced hospital                         |
| PA10 | PANSS at admission: Scale Poor rapport                                 | Score in the PANSS item 'poor rapport' at the time of admission to the referenced hospital                                 |
| PA11 | PANSS at admission: Scale Passive/apathetic social withdrawal          | Score in the PANSS item 'passive/apathetic social withdrawal' at the time of admission to the referenced hospital          |
| PA12 | PANSS at admission: Scale Difficulty in abstract thinking              | Score in the PANSS item 'difficulty in abstract thinking' at the time of admission to the referenced hospital              |
| PA13 | PANSS at admission: Scale Lack of spontaneity and flow of conversation | Score in the PANSS item 'lack of spontaneity and flow of conversation' at the time of admission to the referenced hospital |
| PA14 | PANSS at admission: Scale Stereotyped thinking                         | Score in the PANSS item 'stereotyped thinking' at the time of admission to the referenced hospital                         |
| PA15 | PANSS at admission: Scale Somatic concern                              | Score in the PANSS item 'somatic concern' at the time of admission to the referenced hospital                              |
| PA16 | PANSS at admission: Scale Anxiety                                      | Score in the PANSS item 'anxiety' at the time of admission to the referenced hospital                                      |
| PA17 | PANSS at admission: Scale Guilt feelings                               | Score in the PANSS item 'guilt feelings' at the time of admission to the referenced hospital                               |
| PA18 | PANSS at admission: Scale Tension                                      | Score in the PANSS item 'tension' at the time of admission to the referenced hospital                                      |
| PA19 | PANSS at admission: Scale Mannerisms and posturing                     | Score in the PANSS item 'mannerism and posturing' at the time of admission to the referenced hospital                      |

|      |                                                         |                                                                                                             |
|------|---------------------------------------------------------|-------------------------------------------------------------------------------------------------------------|
| PA20 | PANSS at admission: Scale Depression                    | Score in the PANSS item 'depression' at the time of admission to the referenced hospital                    |
| PA21 | PANSS at admission: Scale Motor retardation             | Score in the PANSS item 'motor retardation' at the time of admission to the referenced hospital             |
| PA22 | PANSS at admission: Scale Uncooperativeness             | Score in the PANSS item 'uncooperativeness' at the time of admission to the referenced hospital             |
| PA23 | PANSS at admission: Scale Unusual thought content       | Score in the PANSS item 'unusual thought content' at the time of admission to the referenced hospital       |
| PA24 | PANSS at admission: Scale Disorientation                | Score in the PANSS item 'disorientation' at the time of admission to the referenced hospital                |
| PA25 | PANSS at admission: Scale Poor attention                | Score in the PANSS item 'poor attention' at the time of admission to the referenced hospital                |
| PA26 | PANSS at admission: Scale Lack of judgement and insight | Score in the PANSS item 'lack of judgement and insight' at the time of admission to the referenced hospital |
| PA27 | PANSS at admission: Scale Disturbance of volition       | Score in the PANSS item 'disturbance of volition' at the time of admission to the referenced hospital       |
| PA28 | PANSS at admission: Scale Poor impulse control          | Score in the PANSS item 'poor impulse control' at the time of admission to the referenced hospital          |
| PA29 | PANSS at admission: Scale Preoccupation                 | Score in the PANSS item 'preoccupation' at the time of admission to the referenced hospital                 |
| PA30 | PANSS at admission: Scale Active social avoidance       | Score in the PANSS item 'active social avoidance' at the time of admission to the referenced hospital       |
| PA_A | PANNS Score at admission                                | PANSS total score at the time of admission to the referenced hospital                                       |
| PA32 | PANSS at discharge: Scale Delusion                      | Score in the PANSS item 'delusion' at the time of discharge from the referenced hospital                    |
| PA33 | PANSS at discharge: Scale Conceptual disorganization    | Score in the PANSS item 'conceptual disorganisation' at the time of discharge from the referenced hospital  |
| PA34 | PANSS at discharge: Scale Hallucinations                | Score in the PANSS item 'hallucinations' at the time of discharge from the referenced hospital              |
| PA35 | PANSS at discharge: Scale Hyperactivity                 | Score in the PANSS item 'hyperactivity' at the time of discharge from the referenced hospital               |
| PA36 | PANSS at discharge: Scale Grandiosity                   | Score in the PANSS item 'grandiosity' at the time of discharge from the referenced hospital                 |



|      |                                                                        |                                                                                                                      |
|------|------------------------------------------------------------------------|----------------------------------------------------------------------------------------------------------------------|
| PA37 | PANSS at discharge: Scale Suspiciousness/persecution                   | Score in the PANSS item 'suspiciousness/persecution' at the time of discharge from the referenced hospital           |
| PA38 | PANSS at discharge: Scale Hostility                                    | Score in the PANSS item 'hostility' at the time of discharge from the referenced hospital                            |
| PA39 | PANSS at discharge: Scale Blunted affect                               | Score in the PANSS item 'blunted affect' at the time of discharge from the referenced hospital                       |
| PA40 | PANSS at discharge: Scale Emotional withdrawal                         | Score in the PANSS item 'emotional withdrawal' at the time of discharge from the referenced hospital                 |
| PA41 | PANSS at discharge: Scale Poor rapport                                 | Score in the PANSS item 'poor rapport' at the time of discharge from the referenced hospital                         |
| PA42 | PANSS at discharge: Passive/apathetic social withdrawal                | Score in the PANSS item 'passive/apathetic social withdrawal' at the time of discharge from the referenced hospital  |
| PA43 | PANSS at discharge: Scale Difficulty in abstract thinking              | Score in the PANSS item 'difficulty in abstract thinking' at the time of discharge from the referenced hospital      |
| PA44 | PANSS at discharge: Scale Lack of spontaneity and flow of conversation | Score in the PANSS item 'spontaneity and flow of conversation' at the time of discharge from the referenced hospital |
| PA45 | PANSS at discharge: Scale Stereotyped thinking                         | Score in the PANSS item 'stereotyped thinking' at the time of discharge from the referenced hospital                 |
| PA46 | PANSS at discharge: Scale Somatic concern                              | Score in the PANSS item 'somatic concern' at the time of discharge from the referenced hospital                      |
| PA47 | PANSS at discharge: Scale Anxiety                                      | Score in the PANSS item 'anxiety' at the time of discharge from the referenced hospital                              |
| PA48 | PANSS at discharge: Scale Guilt feelings                               | Score in the PANSS item 'guilt feelings' at the time of discharge from the referenced hospital                       |
| PA49 | PANSS at discharge: Scale Tension                                      | Score in the PANSS item 'tension' at the time of discharge from the referenced hospital                              |
| PA50 | PANSS at discharge: Scale Mannerisms and posturing                     | Score in the PANSS item 'mannerisms and posturing' at the time of discharge from the referenced hospital             |
| PA51 | PANSS at discharge: Scale Depression                                   | Score in the PANSS item 'depression' at the time of discharge from the referenced hospital                           |
| PA52 | PANSS at discharge: Scale Motor retardation                            | Score in the PANSS item 'motor retardation' at the time of discharge from the referenced hospital                    |
| PA53 | PANSS at discharge: Scale Uncooperativeness                            | Score in the PANSS item 'uncooperativeness' at the time of discharge from the referenced hospital                    |

|       |                                                         |                                                                                                               |
|-------|---------------------------------------------------------|---------------------------------------------------------------------------------------------------------------|
| PA54  | PANSS at discharge: Scale Unusual thought content       | Score in the PANSS item 'unusual thought content' at the time of discharge from the referenced hospital       |
| PA55  | PANSS at discharge: Scale Disorientation                | Score in the PANSS item 'disorientation' at the time of discharge from the referenced hospital                |
| PA56  | PANSS at discharge: Scale Poor attention                | Score in the PANSS item 'poor attention' at the time of discharge from the referenced hospital                |
| PA57  | PANSS at discharge: Scale Lack of judgement and insight | Score in the PANSS item 'lack of judgement and insight' at the time of discharge from the referenced hospital |
| PA58  | PANSS at discharge: Scale Disturbance of volition       | Score in the PANSS item 'disturbance of volition' at the time of discharge from the referenced hospital       |
| PA59  | PANSS at discharge: Scale Poor impulse control          | Score in the PANSS item 'poor impulse control' at the time of discharge from the referenced hospital          |
| PA60  | PANSS at discharge: Scale Preoccupation                 | Score in the PANSS item 'Preoccupation' at the time of discharge from the referenced hospital                 |
| PA61  | PANSS at discharge: Scale Active social avoidance       | Score in the PANSS item 'active social avoidance' at the time of discharge from the referenced hospital       |
| PAS_D | PANNS Score at discharge                                | PANSS total score at the time of discharge from the referenced hospital                                       |
